# Supplementary material for: Structural, cultural and personal barriers to healthcare for older adults in prison: insights from a qualitative study in New South Wales, Australia
Source: Research Square preprint supplement (doi:10.21203/rs.3.rs-6407981/v1), 2025-07-03
Supplement: Supplementary file 1 [file b91cecf6f00e245984355993.pdf]

## **Supplementary Material 1: Interview Guides**

### **I. Interview Guide for Older Incarcerated Adults**

#### **1. Introductory note**

Thank you for accepting the invitation to participate in this study. My name is [name of interviewer] and I am from the University of New South Wales. As you might have read from the participant information sheet, we are doing this study to get a better understanding of older offenders' needs and experiences of care provided to them during their stay in prison. We are starting from the time of people's most recent coming into prison until their release. The aim is to find out what is being done well and any ways we can improve care. I will ask you some questions which will help to find out about your experiences with care during your time of imprisonment. You can stop me and ask questions if what I ask is not clear to you. You can also interrupt me at any time should you feel uncomfortable with answering a question.

#### **2. Assessment, screening and care during entry to prison**

**What was your health condition like when you first entered prison? PROMPTS:** How often did you see a doctor before you came to prison? How often did you see a dentist? Were you seeing any other health professionals?

Do you know of any diagnoses you have been given by a doctor?

Were you taking any medications? Do you remember what for?

How physically active were you?

**3. What was your experience with the care that was provided to you during your most recent entry to prison? PROMPTS:** What staff spoke to you and did assessments [asked questions] when you came in? Do you remember speaking to a Nurse?

What kind of questions did the nurse ask?

Was there anything the nurse didn't ask that you think would be good to know?

Did you find this process good overall? If so, what went well? If not, what do you think could change to make it better?

#### **4. Care during time of imprisonment**

**Have you been sick during your time in prison?**

**PROMPTS:** If yes, could you please tell me about your experiences with health services inside a prison?

- What doctors, nurses or other health professionals have you seen?
- What type of services are you aware of that are provided by the clinic? How do you see the service, just from your own experience?
- What did you like and think worked well for you?
- Are there any improvements that could be made?
- How convenient is the clinic for older offenders?

- If you have been referred for specialist care, for example at a hospital, how was your experience with that service?

**5. Assistance received from others: Have you ever received assistance with your health from any other person apart from a doctor or nurse?**

**PROMPTS:** Have you ever received assistance from another inmate? Have you ever received assistance from a prison officer? Have you ever received assistance from anyone else? If yes, what type of support or assistance did you need? How was your experience with that support or assistance?

**6. Pre-release assessment and planning (for offenders who are on parole or those who are getting released)**

**6.1. How do you feel about being released and getting back to your community?**

**PROMPTS:** What is good about this? Do you think there will be any challenges? What things are being done for you as part of your release? Who have you spoken to? What assessments have they done? How do you feel your health is now, at release, compared to when you came into prison?

**Thank you for your time talking to me today. Are there any questions you want to ask me before we finish? [If no, thank the person again and end the interview]**

## **II. Interview Guide for Corrective Services staff**

### **Interview Questions**

#### Introductory questions

- To start off our discussion, can you tell me your role in the centre?
- The focus of the discussion is on care and management of older offenders. What does the situation look like overall in the centre [probe for trend in number, how the centre is coping with it]
- Defining the older prisoner [probe for any age cut-off in use by CS staff]
- What would you describe as some of the day-to-day challenges for caring older prisoners?

#### Screening and placement

- When older offenders first arrive at the centre what does the screening process look like? [Probe for types of screening, tools in use, roles between Corrective services and Justice health in the process]
- What are the placement options for older offenders? [probe options for sick and frail offenders, segregation Vs mainstream service, availability of specialised services]
- What challenges do you see in the screening and placement process?

#### Communication and Relationship with Correctional Centre Staffs

- Can you please describe the communication with Justice Health staffs regarding care of older offenders? I) Frequency, ii) timeliness and iii) accuracy of the communication iv) Problem solving nature of the communication
- How does the care provision to older prisoners relate you with Justice health staff? shared goals? shared knowledge? mutual respect?

#### Tensions b/n corrective services and Justice health

- What kind of tensions do you observe between Justice health & corrective services in the management of older offenders [probe – overt vs latent tensions]
- Types and causes of tensions. Probe for: levels at a) individual, b) group, c) organisational
- Tensions related to new learning or change or innovation (individual or organisational level)
- Tensions b/n corrective services and Justice health routines
- Tensions due to conflicting mandates, roles, and values at individual or group level
- Tensions due to multiple goals
- Addressing tensions at individual level or collectively though group, organisational, interorganisational: [e.g. through integrating several approaches]

#### Recommendations to improve the care and management of older prisoners

- Given the challenges in the care and management of older prisoners, what do you recommend to improve current practice?

### **III. Interview Guide for Justice Health staff**

#### **Interview Questions**

##### **General**

- Can you walk me through the daily routine of care provision to prisoners?
- How do the older prisoners go with the daily routine?
- What would you describe as some of the day-to-day challenges for caring older prisoners?

##### **Patient Care**

- What are some of the main health/welfare/management issues associated with older prisoners?
- How do you see the quality of care that is provided to older offenders? (probe for stages and types of care – Screening, Palliative Care/End-of-life care, Dementia/Cognitive Impairment, mental illness, Chronic diseases, injuries, emergency care, disability)
- What are some of the barriers to providing care to older prisoners?
- How do patients (and their family members) get consulted regarding their illness?

##### **Screening and placement**

- When older offenders first arrive at the centre what does the screening process look like? [Probe for types of screening, tools in use, roles between Corrective services and Justice health in the process]
- What are the placement options for older offenders? [probe options for sick and frail offenders, segregation Vs mainstream service, availability of specialised services]
- What challenges do you see in the screening and placement process?

##### **Communication and Relationship with Correctional Centre Staffs**

- Can you please describe the communication with corrective services staffs regarding care of older offenders? I) Frequency, ii) timeliness and iii) accuracy of the communication iv) Problem solving nature of the communication
- How does the care provision to older prisoners relate you with corrective services staff? shared goals? shared knowledge? mutual respect?

##### **Tensions b/n corrective services and Justice health**

- What kind of tensions do you observe between Justice health & corrective services in the management of older offenders [probe – overt vs latent tensions]
- Types and causes of tensions. Probe for: levels at a) individual, b) group, c) organisational
- Tensions related to new learning or change or innovation (individual or organisational level)
- Tensions b/n corrective services and Justice health routines
- Tensions due to conflicting mandates, roles, and values at individual or group level
- Tensions due to multiple goals

- Addressing tensions at individual level or collectively through group, organisational, interorganisational: [e.g. through integrating several approaches]

Recommendations to improve the care and management of older prisoners

- Given the challenges in the care and management of older prisoners, what do you recommend to improve current practice?
